# Supplementary material for: Coordinated Tbx3/Tbx5 transcriptional control of the adult ventricular conduction system
Source: bioRxiv preprint, doi:10.1101/2024.08.29.610377, version 2 (2025-02-13)
Supplement: Supplementary data [file 610377_file03.xlsx]

## Sheet: Fig1C_Atrium_dCKO_Tbx3
Fig1C_Atrium_dCKO_Tbx3_RelativeExpression_box_Pvalues
	gene	group1	group1_shapiro_P	group2	group2_shapiro_P	p_t	p.adj_t	p_wilcoxon	p.adj_wilcoxon	p.adj_t_signif
1	Tbx3 relative expression	Tbx3+/+:Tbx5+/+:MinKCre/+	0.413	Tbx3F/F:Tbx5F/F:MinKCre/+	0.88	0.886306	0.95	1	1	ns
2	Tbx3 relative expression	Tbx3+/+:Tbx5+/+:MinKCre/+	0.413	Tbx3F/+:Tbx5F/+:MinKCre/+	0.566	0.0342378	0.28	0.1	0.4	ns
3	Tbx3 relative expression	Tbx3+/+:Tbx5+/+:MinKCre/+	0.413	Tbx3F/F:Tbx5+/+:MinKCre/+	0.85	0.104036	0.28	0.2	0.4	ns
4	Tbx3 relative expression	Tbx3+/+:Tbx5+/+:MinKCre/+	0.413	Tbx3+/+:Tbx5F/F:MinKCre/+	0.316	0.152113	0.28	0.4	0.5	ns
5	Tbx3 relative expression	Tbx3F/F:Tbx5F/F:MinKCre/+	0.88	Tbx3F/+:Tbx5F/+:MinKCre/+	0.566	0.0788677	0.28	0.1	0.4	ns
6	Tbx3 relative expression	Tbx3F/F:Tbx5F/F:MinKCre/+	0.88	Tbx3F/F:Tbx5+/+:MinKCre/+	0.85	0.178655	0.28	0.2	0.4	ns
7	Tbx3 relative expression	Tbx3F/F:Tbx5F/F:MinKCre/+	0.88	Tbx3+/+:Tbx5F/F:MinKCre/+	0.316	0.199186	0.28	0.4	0.5	ns

## Sheet: Fig1C_Atrium_dCKO_Tbx5
Fig1C_Atrium_dCKO_Tbx5_RelativeExpression_box_Pvalues
	gene	group1	group1_shapiro_P	group2	group2_shapiro_P	p_t	p.adj_t	p_wilcoxon	p.adj_wilcoxon	p.adj_t_signif
1	Tbx5 relative expression	Tbx3+/+:Tbx5+/+:MinKCre/+	0.331	Tbx3F/F:Tbx5F/F:MinKCre/+	0.255	0.493275	0.75	0.7	1	ns
2	Tbx5 relative expression	Tbx3+/+:Tbx5+/+:MinKCre/+	0.331	Tbx3F/+:Tbx5F/+:MinKCre/+	0.003	0.812313	0.89	1	1	ns
3	Tbx5 relative expression	Tbx3+/+:Tbx5+/+:MinKCre/+	0.331	Tbx3F/F:Tbx5+/+:MinKCre/+	0.614	0.306806	0.75	0.4	1	ns
4	Tbx5 relative expression	Tbx3+/+:Tbx5+/+:MinKCre/+	0.331	Tbx3+/+:Tbx5F/F:MinKCre/+	0.759	0.52368	0.75	0.4	1	ns
5	Tbx5 relative expression	Tbx3F/F:Tbx5F/F:MinKCre/+	0.255	Tbx3F/+:Tbx5F/+:MinKCre/+	0.003	0.440181	0.75	1	1	ns
6	Tbx5 relative expression	Tbx3F/F:Tbx5F/F:MinKCre/+	0.255	Tbx3F/F:Tbx5+/+:MinKCre/+	0.614	0.885888	0.89	1	1	ns
7	Tbx5 relative expression	Tbx3F/F:Tbx5F/F:MinKCre/+	0.255	Tbx3+/+:Tbx5F/F:MinKCre/+	0.759	0.656277	0.82	1	1	ns

## Sheet: Fig1C_VCS_dCKO_Tbx3
Fig1C_VCS_dCKO_Tbx3_RelativeExpression_box_Pvalues
	gene	group1	group1_shapiro_P	group2	group2_shapiro_P	p_t	p.adj_t	p_wilcoxon	p.adj_wilcoxon	p.adj_t_signif	one-tailed p_wilcoxon
1	Tbx3 relative expression	Tbx3+/+:Tbx5+/+:MinKCre/+	0.299	Tbx3F/F:Tbx5F/F:MinKCre/+	0.372	0.00520362	0.0081	0.1	0.12	**
2	Tbx3 relative expression	Tbx3+/+:Tbx5+/+:MinKCre/+	0.299	Tbx3F/+:Tbx5F/+:MinKCre/+	0.607	0.0105922	0.013	0.1	0.12	*
3	Tbx3 relative expression	Tbx3+/+:Tbx5+/+:MinKCre/+	0.299	Tbx3F/F:Tbx5+/+:MinKCre/+	0.693	0.00570078	0.0081	0.1	0.12	**
4	Tbx3 relative expression	Tbx3+/+:Tbx5+/+:MinKCre/+	0.299	Tbx3+/+:Tbx5F/F:MinKCre/+	0.02	0.315244	0.35	0.2	0.22	ns
5	Tbx3 relative expression	Tbx3F/F:Tbx5F/F:MinKCre/+	0.372	Tbx3F/+:Tbx5F/+:MinKCre/+	0.607	0.000612096	0.0015	0.1	0.12	**
6	Tbx3 relative expression	Tbx3F/F:Tbx5F/F:MinKCre/+	0.372	Tbx3F/F:Tbx5+/+:MinKCre/+	0.693	0.803409	0.8	1	1	ns
7	Tbx3 relative expression	Tbx3F/F:Tbx5F/F:MinKCre/+	0.372	Tbx3+/+:Tbx5F/F:MinKCre/+	0.02	2.59E-07	2.60E-06	0.1	0.12	****	0.05

## Sheet: Fig1C_VCS_dCKO_Tbx5
Fig1C_VCS_dCKO_Tbx5_RelativeExpression_box_Pvalues
	gene	group1	group1_shapiro_P	group2	group2_shapiro_P	p_t	p.adj_t	p_wilcoxon	p.adj_wilcoxon	p.adj_t_signif
1	Tbx5 relative expression	Tbx3+/+:Tbx5+/+:MinKCre/+	0.499	Tbx3F/F:Tbx5F/F:MinKCre/+	0.97	0.00523626	0.0075	0.1	0.12	**
2	Tbx5 relative expression	Tbx3+/+:Tbx5+/+:MinKCre/+	0.499	Tbx3F/+:Tbx5F/+:MinKCre/+	0.981	0.0220448	0.028	0.1	0.12	*
3	Tbx5 relative expression	Tbx3+/+:Tbx5+/+:MinKCre/+	0.499	Tbx3F/F:Tbx5+/+:MinKCre/+	0.029	0.232369	0.26	0.2	0.22	ns
4	Tbx5 relative expression	Tbx3+/+:Tbx5+/+:MinKCre/+	0.499	Tbx3+/+:Tbx5F/F:MinKCre/+	0.817	0.00517509	0.0075	0.1	0.12	**
5	Tbx5 relative expression	Tbx3F/F:Tbx5F/F:MinKCre/+	0.97	Tbx3F/+:Tbx5F/+:MinKCre/+	0.981	1.23224946641128e-08	1e-07	0.1	0.12	****
6	Tbx5 relative expression	Tbx3F/F:Tbx5F/F:MinKCre/+	0.97	Tbx3F/F:Tbx5+/+:MinKCre/+	0.029	0.000834099	0.0021	0.1	0.12	**
7	Tbx5 relative expression	Tbx3F/F:Tbx5F/F:MinKCre/+	0.97	Tbx3+/+:Tbx5F/F:MinKCre/+	0.817	0.291087	0.29	0.7	0.7	ns

## Sheet: Fig1C_Ventricles_dCKO_Tbx3
Fig1C_Ventricles_dCKO_Tbx3_RelativeExpression_box_Pvalues
	gene	group1	group1_shapiro_P	group2	group2_shapiro_P	p_t	p.adj_t	p_wilcoxon	p.adj_wilcoxon	p.adj_t_signif
1	Tbx3 relative expression	Tbx3+/+:Tbx5+/+:MinKCre/+	0.514	Tbx3F/F:Tbx5F/F:MinKCre/+	0.177	0.789767	0.9	1	1	ns
2	Tbx3 relative expression	Tbx3+/+:Tbx5+/+:MinKCre/+	0.514	Tbx3F/+:Tbx5F/+:MinKCre/+	0.303	0.751437	0.9	1	1	ns
3	Tbx3 relative expression	Tbx3+/+:Tbx5+/+:MinKCre/+	0.514	Tbx3F/F:Tbx5+/+:MinKCre/+	0.052	0.421263	0.9	0.7	1	ns
4	Tbx3 relative expression	Tbx3+/+:Tbx5+/+:MinKCre/+	0.514	Tbx3+/+:Tbx5F/F:MinKCre/+	0.405	0.288693	0.9	0.2	1	ns
5	Tbx3 relative expression	Tbx3F/F:Tbx5F/F:MinKCre/+	0.177	Tbx3F/+:Tbx5F/+:MinKCre/+	0.303	0.904043	0.9	1	1	ns
6	Tbx3 relative expression	Tbx3F/F:Tbx5F/F:MinKCre/+	0.177	Tbx3F/F:Tbx5+/+:MinKCre/+	0.052	0.574239	0.9	0.7	1	ns
7	Tbx3 relative expression	Tbx3F/F:Tbx5F/F:MinKCre/+	0.177	Tbx3+/+:Tbx5F/F:MinKCre/+	0.405	0.417549	0.9	0.4	1	ns

## Sheet: Fig1C_Ventricles_dCKO_Tbx5
Fig1C_Ventricles_dCKO_Tbx5_RelativeExpression_box_Pvalues
	gene	group1	group1_shapiro_P	group2	group2_shapiro_P	p_t	p.adj_t	p_wilcoxon	p.adj_wilcoxon	p.adj_t_signif
1	Tbx5 relative expression	Tbx3+/+:Tbx5+/+:MinKCre/+	0.32	Tbx3F/F:Tbx5F/F:MinKCre/+	0.572	0.390745	0.53	0.7	0.78	ns
2	Tbx5 relative expression	Tbx3+/+:Tbx5+/+:MinKCre/+	0.32	Tbx3F/+:Tbx5F/+:MinKCre/+	0.954	0.14973	0.53	0.4	0.78	ns
3	Tbx5 relative expression	Tbx3+/+:Tbx5+/+:MinKCre/+	0.32	Tbx3F/F:Tbx5+/+:MinKCre/+	0.825	0.356964	0.53	0.4	0.78	ns
4	Tbx5 relative expression	Tbx3+/+:Tbx5+/+:MinKCre/+	0.32	Tbx3+/+:Tbx5F/F:MinKCre/+	0.687	0.473553	0.53	1	1	ns
5	Tbx5 relative expression	Tbx3F/F:Tbx5F/F:MinKCre/+	0.572	Tbx3F/+:Tbx5F/+:MinKCre/+	0.954	0.171081	0.53	0.2	0.67	ns
6	Tbx5 relative expression	Tbx3F/F:Tbx5F/F:MinKCre/+	0.572	Tbx3F/F:Tbx5+/+:MinKCre/+	0.825	0.251455	0.53	0.2	0.67	ns
7	Tbx5 relative expression	Tbx3F/F:Tbx5F/F:MinKCre/+	0.572	Tbx3+/+:Tbx5F/F:MinKCre/+	0.687	0.297389	0.53	0.2	0.67	ns

## Sheet: Fig3L_VCS_dCKO_Col1a1
Fig3L_VCS_dCKO_Fibrosos_markers_Col1a1_expression_RelativeExpression_box_Pvalues
	gene	group1	group1_shapiro_P	group2	group2_shapiro_P	p_t	p.adj_t	p_wilcoxon	p.adj_wilcoxon	p.adj_t_signif
1	Col1a1 relative expression	Tbx3+/+:Tbx5+/+:MinKCre/+	0.407	Tbx3F/F:Tbx5F/F:MinKCre/+	0.877	0.906074	0.91	1	1	ns
2	Col1a1 relative expression	Tbx3+/+:Tbx5+/+:MinKCre/+	0.407	Tbx3F/+:Tbx5F/+:MinKCre/+	0.371	0.189104	0.44	0.2	0.5	ns
3	Col1a1 relative expression	Tbx3+/+:Tbx5+/+:MinKCre/+	0.407	Tbx3F/F:Tbx5+/+:MinKCre/+	0.236	0.611265	0.87	1	1	ns
4	Col1a1 relative expression	Tbx3+/+:Tbx5+/+:MinKCre/+	0.407	Tbx3+/+:Tbx5F/F:MinKCre/+	0.099	0.791613	0.88	0.7	1	ns
5	Col1a1 relative expression	Tbx3F/F:Tbx5F/F:MinKCre/+	0.877	Tbx3F/+:Tbx5F/+:MinKCre/+	0.371	0.0172684	0.086	0.1	0.33	ns
6	Col1a1 relative expression	Tbx3F/F:Tbx5F/F:MinKCre/+	0.877	Tbx3F/F:Tbx5+/+:MinKCre/+	0.236	0.305632	0.51	0.4	0.67	ns
7	Col1a1 relative expression	Tbx3F/F:Tbx5F/F:MinKCre/+	0.877	Tbx3+/+:Tbx5F/F:MinKCre/+	0.099	0.764198	0.88	1	1	ns

## Sheet: Fig3L_VCS_dCKO_Postn
Fig3L_VCS_dCKO_Fibrosos_markers_Postn_expression_RelativeExpression_box_Pvalues
	gene	group1	group1_shapiro_P	group2	group2_shapiro_P	p_t	p.adj_t	p_wilcoxon	p.adj_wilcoxon	p.adj_t_signif
1	Postn relative expression	Tbx3+/+:Tbx5+/+:MinKCre/+	NA	Tbx3F/F:Tbx5F/F:MinKCre/+	0.484	0.951038	0.95	1	1	ns
2	Postn relative expression	Tbx3+/+:Tbx5+/+:MinKCre/+	NA	Tbx3F/+:Tbx5F/+:MinKCre/+	0.008	0.112413	0.28	0.2	0.4	ns
3	Postn relative expression	Tbx3+/+:Tbx5+/+:MinKCre/+	NA	Tbx3F/F:Tbx5+/+:MinKCre/+	0.894	0.0751121	0.28	0.2	0.4	ns
4	Postn relative expression	Tbx3+/+:Tbx5+/+:MinKCre/+	NA	Tbx3+/+:Tbx5F/F:MinKCre/+	0.958	0.233033	0.33	0.4	0.5	ns
5	Postn relative expression	Tbx3F/F:Tbx5F/F:MinKCre/+	0.484	Tbx3F/+:Tbx5F/+:MinKCre/+	0.008	0.0904927	0.28	0.1	0.4	ns
6	Postn relative expression	Tbx3F/F:Tbx5F/F:MinKCre/+	0.484	Tbx3F/F:Tbx5+/+:MinKCre/+	0.894	0.0097374	0.097	0.1	0.4	ns
7	Postn relative expression	Tbx3F/F:Tbx5F/F:MinKCre/+	0.484	Tbx3+/+:Tbx5F/F:MinKCre/+	0.958	0.204256	0.33	0.4	0.5	ns

## Sheet: Fig4A_VCS_dCKO_Nodal-mark
Fig4A_VCS_dCKO_Nodal-markers_RelativeExpression_box_Pvalues
	Gene	group1	group1_shapiro_P	group2	group2_shapiro_P	p_t	p.adj_t	p_wilcoxon	p.adj_wilcoxon	p.adj_t_signif	one-tailed p_wilcoxon
1	Cacna1d relative expression	Tbx3+/+:Tbx5+/+:MinKCre/+	0.474	Tbx3F/F:Tbx5F/F:MinKCre/+	0.227	0.000450078	0.00045	0.1	0.1	***
2	Cacna1g relative expression	Tbx3+/+:Tbx5+/+:MinKCre/+	0.614	Tbx3F/F:Tbx5F/F:MinKCre/+	0.642	0.00784096	0.0078	0.1	0.1	**
3	Cacna1h relative expression	Tbx3+/+:Tbx5+/+:MinKCre/+	0.722	Tbx3F/F:Tbx5F/F:MinKCre/+	0.262	0.000177172	0.00018	0.1	0.1	***
4	Cx30.2 relative expression	Tbx3+/+:Tbx5+/+:MinKCre/+	0.324	Tbx3F/F:Tbx5F/F:MinKCre/+	0.852	5.41E-06	5.40E-06	0.1	0.1	****
5	Cx45 relative expression	Tbx3+/+:Tbx5+/+:MinKCre/+	0.849	Tbx3F/F:Tbx5F/F:MinKCre/+	0.073	8.78E-06	8.80E-06	0.1	0.1	****
6	Hcn1 relative expression	Tbx3+/+:Tbx5+/+:MinKCre/+	0.563	Tbx3F/F:Tbx5F/F:MinKCre/+	0.005	0.00979441	0.0098	0.1	0.1	**	0.05
7	Hcn4 relative expression	Tbx3+/+:Tbx5+/+:MinKCre/+	0.803	Tbx3F/F:Tbx5F/F:MinKCre/+	0.249	7.99E-05	8.00E-05	0.1	0.1	****

## Sheet: Fig4B_VCS_dCKO_VCS-marker
Fig4B_VCS_dCKO_VCS-markers_RelativeExpression_box_Pvalues
	Gene	group1	group1_shapiro_P	group2	group2_shapiro_P	p_t	p.adj_t	p_wilcoxon	p.adj_wilcoxon	p.adj_t_signif	one-tailed p_wilcoxon
1	Cx40 relative expression	Tbx3+/+:Tbx5+/+:MinKCre/+	0.305	Tbx3F/F:Tbx5F/F:MinKCre/+	0.693	0.00152612	0.0015	0.1	0.1	**
2	Kcnj12 relative expression	Tbx3+/+:Tbx5+/+:MinKCre/+	0.061	Tbx3F/F:Tbx5F/F:MinKCre/+	0.12	0.00814791	0.0081	0.1	0.1	**
3	Kcnj2 relative expression	Tbx3+/+:Tbx5+/+:MinKCre/+	0.072	Tbx3F/F:Tbx5F/F:MinKCre/+	0.432	0.00172066	0.0017	0.1	0.1	**
4	Kcnj3 relative expression	Tbx3+/+:Tbx5+/+:MinKCre/+	0.394	Tbx3F/F:Tbx5F/F:MinKCre/+	0.483	0.000332892	0.00033	0.1	0.1	***
5	Kcnj4 relative expression	Tbx3+/+:Tbx5+/+:MinKCre/+	0.366	Tbx3F/F:Tbx5F/F:MinKCre/+	0.362	0.0235478	0.024	0.1	0.1	*
6	Ryr2 relative expression	Tbx3+/+:Tbx5+/+:MinKCre/+	0.278	Tbx3F/F:Tbx5F/F:MinKCre/+	0.158	0.00235863	0.0024	0.1	0.1	**
7	Scn5a relative expression	Tbx3+/+:Tbx5+/+:MinKCre/+	0.941	Tbx3F/F:Tbx5F/F:MinKCre/+	0.021	0.00214591	0.0021	0.1	0.1	**	0.05
8	Task1 relative expression	Tbx3+/+:Tbx5+/+:MinKCre/+	0.618	Tbx3F/F:Tbx5F/F:MinKCre/+	0.617	0.00137886	0.0014	0.1	0.1	**

[truncated: 1 more sheets: Fig4C_VCS_dCKO_WM-markers]
